# Supplementary material for: Selenium Induces Pancreatic Cancer Cell Death Alone and in Combination with Gemcitabine
Source: Biomedicines. 2022 Jan 11;10(1):149. doi: 10.3390/biomedicines10010149 (PMC8773897; doi:10.3390/biomedicines10010149)
Supplement: Supplementary file 1 [file biomedicines-10-00149-s001.zip]

Archive with 15 entries (15 files):
- FigureS1.png
- FigureS2.png
- FigureS3.png
- FIgureS4.png
- FIgureS5.png
- FileS1.zip
- FileS2.html
- FileS3.html
- FileS4.html
- FileS5.html
- FileS6.html
- FileS7.html
- FileS8.html
- Supplemental Tables.xlsx
- Supplemental_Captions.pdf
