# Supplementary material for: Selenium Induces Pancreatic Cancer Cell Death Alone and in Combination with Gemcitabine
Source: Biomedicines. 2022 Jan 11;10(1):149. doi: 10.3390/biomedicines10010149 (PMC8773897; doi:10.3390/biomedicines10010149)
Supplement: Supplementary file 1 [file biomedicines-10-00149-s001.zip › Supplemental Tables.xlsx]

## Sheet: Table S1 - Cell Line MuSyC
Parameter	BxPC-3	Mia Paca2	Panc1	Description
E0_lower	0.747448	0.642183	0.773401	The effect metric when no drug is present (d1=d2=0)
E0	0.769726	0.664225	0.804357
E0_upper	0.794968	0.692362	0.845473
E1_lower	0.496663	0.570263	0.691146	The maximum effect achievable by drug 1 alone
E1	0.521452	0.597827	0.738406
E1_upper	0.547061	0.622067	0.778843
E2_lower	0.377385	0.174552	0.411259	The maximum effect achievable by drug 2 alone
E2	0.393579	0.200086	0.432811
E2_upper	0.40999	0.228801	0.458885
E3_lower	0.312147	0.158816	0.360967	The maximum effect achievable by the combination of both drugs 1 and 2
E3	0.33037	0.181626	0.390318
E3_upper	0.348436	0.207931	0.432098
h1_lower	1.39079	40.1405	38.2259	The Hill slope of drug 1
h1	7.91055	41.6467	38.858
h1_upper	23.5765	42.3313	39.9513
h2_lower	16.0432	24.4738	25.6143	The Hill slope of drug 2
h2	30.5931	25.418	26.7318
h2_upper	42.9854	26.1549	27.2749
C1_lower	0.00869079	0.0102649	0.0249293	The EC50 of drug 1 (this is the concentration of drug 1 that achieves an effect halfway between E0 and E1)
C1	0.0100253	0.0118939	0.0249313
C1_upper	0.0117571	0.0131038	0.0267095
C2_lower	2.45081	2.47562	2.40298	The EC50 of drug 2 (this is the concentration of drug 2 that achieves an effect halfway between E0 and E2)
C2	2.48039	2.50602	2.45319
C2_upper	2.50261	2.5335	2.50996
beta_lower	0.104721	-0.0334356	-0.00853042	Synergistic Efficacy – How many times stronger (or weaker) the combination is, compared to the strongest single drug. Synergistic (>0). Antagonistic (<0)
beta	0.168042	0.0397734	0.114368
beta_upper	0.24143	0.126187	0.222566
alpha12_lower	0.875536	0.98203	0.983557	Synergistic Potency – How drug 1 affects drug 2’s dose. In the presence of drug 1, drug 2’s dose is effectively multiplied by alpha12. Synergistic (>1). Antagonistic (<1).
alpha12	0.947762	1.00019	1
alpha12_upper	0.980565	1.02122	2.74043
alpha21_lower	0.278916	0.982916	1	Synergistic Potency – How drug 2 affects drug 1’s dose. In the presence of drug 2, drug 1’s dose is effectively multiplied by alpha21. Synergistic (>1). Antagonistic (<1).
alpha21	0.891945	1.40671	1
alpha21_upper	1.22368	2.88377	1.0203
gamma12_lower	0.843777	0.950872	0.872255	Synergistic Cooperativity – How drug 1 affects drug 2’s Hill slope. In the presence of drug 1, drug 2’s Hill slope is effectively multiplied by gamma12. Synergistic (>1). Antagonistic (<1).
gamma12	0.951526	0.973601	0.993345
gamma12_upper	1.41014	1.00236	1.31779
gamma21_lower	0.719638	0.623343	0.97494	Synergistic Cooperativity – How drug 2 affects drug 1’s Hill slope. In the presence of drug 2, drug 1’s Hill slope is effectively multiplied by gamma21. Synergistic (>1). Antagonistic (<1).
gamma21	1.12109	0.970013	1
gamma21_upper	3.13221	1.65983	1
Converged	True	True	True	Whether or not the MuSyC model converged to a best fit
R^2	0.959142	0.965571	0.879679	R^2 value
RSS	0.045592	0.0789073	0.165756	Residual sum of squared errors
BIC	-377.716	-344.803	-286.96	Bayesian information criterion
AIC	-398.304	-365.391	-306.812	Akaike information criterion
Bootstrap Iterations	353	499	301	The number of successful bootstrap iterations to find confidence intervals
drug1.name	Gemcitabine	Gemcitabine	Gemcitabine
drug2.name	MSeA	MSeA	MSeA
drug1.units	μM	μM	μM
drug2.units	μM	μM	μM
sample	BxPC-3	MIA PaCa2	PANC-1
expt.date	10/21/2020	10/21/2020	10/21/2020

## Sheet: Table S2 - Cell Line HSA
drug1.name	drug2.name	drug1.units	drug2.units	sample	drug1.conc	drug2.conc	effect	hsa
Gemcitabine	MSeA	μM	μM	BxPC-3	0	0	0.7795
Gemcitabine	MSeA	μM	μM	BxPC-3	0.001	0	0.788
Gemcitabine	MSeA	μM	μM	BxPC-3	0.01	0	0.7406
Gemcitabine	MSeA	μM	μM	BxPC-3	0.1	0	0.5228
Gemcitabine	MSeA	μM	μM	BxPC-3	1	0	0.5196
Gemcitabine	MSeA	μM	μM	BxPC-3	0	2.5	0.5679
Gemcitabine	MSeA	μM	μM	BxPC-3	0	5	0.4102
Gemcitabine	MSeA	μM	μM	BxPC-3	0	10	0.4195
Gemcitabine	MSeA	μM	μM	BxPC-3	0.001	2.5	0.5395	0.0371333
Gemcitabine	MSeA	μM	μM	BxPC-3	0.001	5	0.3767	0.0162667
Gemcitabine	MSeA	μM	μM	BxPC-3	0.001	10	0.3691	0.0600667
Gemcitabine	MSeA	μM	μM	BxPC-3	0.01	2.5	0.5346	0.0420333
Gemcitabine	MSeA	μM	μM	BxPC-3	0.01	5	0.3933	-0.000333333
Gemcitabine	MSeA	μM	μM	BxPC-3	0.01	10	0.3812	0.0479667
Gemcitabine	MSeA	μM	μM	BxPC-3	0.1	2.5	0.5031	0.00603333
Gemcitabine	MSeA	μM	μM	BxPC-3	0.1	5	0.3749	0.0180667
Gemcitabine	MSeA	μM	μM	BxPC-3	0.1	10	0.3382	0.0909667
Gemcitabine	MSeA	μM	μM	BxPC-3	1	2.5	0.4322	0.0993
Gemcitabine	MSeA	μM	μM	BxPC-3	1	5	0.3423	0.0506667
Gemcitabine	MSeA	μM	μM	BxPC-3	1	10	0.3108	0.118367
Gemcitabine	MSeA	μM	μM	BxPC-3	0	0	0.7644
Gemcitabine	MSeA	μM	μM	BxPC-3	0.001	0	0.7827
Gemcitabine	MSeA	μM	μM	BxPC-3	0.01	0	0.6446
Gemcitabine	MSeA	μM	μM	BxPC-3	0.1	0	0.4791
Gemcitabine	MSeA	μM	μM	BxPC-3	1	0	0.5345
Gemcitabine	MSeA	μM	μM	BxPC-3	0	2.5	0.584
Gemcitabine	MSeA	μM	μM	BxPC-3	0	5	0.3857
Gemcitabine	MSeA	μM	μM	BxPC-3	0	10	0.4453
Gemcitabine	MSeA	μM	μM	BxPC-3	0.001	2.5	0.5759	0.000733333
Gemcitabine	MSeA	μM	μM	BxPC-3	0.001	5	0.3863	0.00666667
Gemcitabine	MSeA	μM	μM	BxPC-3	0.001	10	0.3587	0.0704667
Gemcitabine	MSeA	μM	μM	BxPC-3	0.01	2.5	0.5618	0.0148333
Gemcitabine	MSeA	μM	μM	BxPC-3	0.01	5	0.396	-0.00303333
Gemcitabine	MSeA	μM	μM	BxPC-3	0.01	10	0.3973	0.0318667
Gemcitabine	MSeA	μM	μM	BxPC-3	0.1	2.5	0.5196	-0.0104667
Gemcitabine	MSeA	μM	μM	BxPC-3	0.1	5	0.3293	0.0636667
Gemcitabine	MSeA	μM	μM	BxPC-3	0.1	10	0.3237	0.105467
Gemcitabine	MSeA	μM	μM	BxPC-3	1	2.5	0.4851	0.0464
Gemcitabine	MSeA	μM	μM	BxPC-3	1	5	0.3281	0.0648667
Gemcitabine	MSeA	μM	μM	BxPC-3	1	10	0.3232	0.105967
Gemcitabine	MSeA	μM	μM	BxPC-3	0	0	0.7694
Gemcitabine	MSeA	μM	μM	BxPC-3	0.001	0	0.7336
Gemcitabine	MSeA	μM	μM	BxPC-3	0.01	0	0.562
Gemcitabine	MSeA	μM	μM	BxPC-3	0.1	0	0.5255
Gemcitabine	MSeA	μM	μM	BxPC-3	1	0	0.5404
Gemcitabine	MSeA	μM	μM	BxPC-3	0	2.5	0.578
Gemcitabine	MSeA	μM	μM	BxPC-3	0	5	0.383
Gemcitabine	MSeA	μM	μM	BxPC-3	0	10	0.4227
Gemcitabine	MSeA	μM	μM	BxPC-3	0.001	2.5	0.5173	0.0593333
Gemcitabine	MSeA	μM	μM	BxPC-3	0.001	5	0.3595	0.0334667
Gemcitabine	MSeA	μM	μM	BxPC-3	0.001	10	0.3571	0.0720667
Gemcitabine	MSeA	μM	μM	BxPC-3	0.01	2.5	0.5317	0.0449333
Gemcitabine	MSeA	μM	μM	BxPC-3	0.01	5	0.378	0.0149667
Gemcitabine	MSeA	μM	μM	BxPC-3	0.01	10	0.3588	0.0703667
Gemcitabine	MSeA	μM	μM	BxPC-3	0.1	2.5	0.476	0.0331333
Gemcitabine	MSeA	μM	μM	BxPC-3	0.1	5	0.3465	0.0464667
Gemcitabine	MSeA	μM	μM	BxPC-3	0.1	10	0.3129	0.116267
Gemcitabine	MSeA	μM	μM	BxPC-3	1	2.5	0.4385	0.093
Gemcitabine	MSeA	μM	μM	BxPC-3	1	5	0.3081	0.0848667
Gemcitabine	MSeA	μM	μM	BxPC-3	1	10	0.3205	0.108667
Gemcitabine	MSeA	μM	μM	MiaPaca2	0	0	0.6413
Gemcitabine	MSeA	μM	μM	MiaPaca2	0.001	0	0.676
Gemcitabine	MSeA	μM	μM	MiaPaca2	0.01	0	0.6999
Gemcitabine	MSeA	μM	μM	MiaPaca2	0.1	0	0.5992
Gemcitabine	MSeA	μM	μM	MiaPaca2	1	0	0.6576
Gemcitabine	MSeA	μM	μM	MiaPaca2	0	2.5	0.5009
Gemcitabine	MSeA	μM	μM	MiaPaca2	0	5	0.1561
Gemcitabine	MSeA	μM	μM	MiaPaca2	0	10	0.1839
Gemcitabine	MSeA	μM	μM	MiaPaca2	0.001	2.5	0.4598	0.0169667
Gemcitabine	MSeA	μM	μM	MiaPaca2	0.001	5	0.266	-0.0906333
Gemcitabine	MSeA	μM	μM	MiaPaca2	0.001	10	0.1739	0.00476667
Gemcitabine	MSeA	μM	μM	MiaPaca2	0.01	2.5	0.4293	0.0474667
Gemcitabine	MSeA	μM	μM	MiaPaca2	0.01	5	0.1945	-0.0191333
Gemcitabine	MSeA	μM	μM	MiaPaca2	0.01	10	0.1759	0.00276667
Gemcitabine	MSeA	μM	μM	MiaPaca2	0.1	2.5	0.4394	0.0373667
Gemcitabine	MSeA	μM	μM	MiaPaca2	0.1	5	0.1956	-0.0202333
Gemcitabine	MSeA	μM	μM	MiaPaca2	0.1	10	0.1724	0.00626667
Gemcitabine	MSeA	μM	μM	MiaPaca2	1	2.5	0.4595	0.0172667
Gemcitabine	MSeA	μM	μM	MiaPaca2	1	5	0.1622	0.0131667
Gemcitabine	MSeA	μM	μM	MiaPaca2	1	10	0.1442	0.0344667
Gemcitabine	MSeA	μM	μM	MiaPaca2	0	0	0.6392
Gemcitabine	MSeA	μM	μM	MiaPaca2	0.001	0	0.706
Gemcitabine	MSeA	μM	μM	MiaPaca2	0.01	0	0.6692
Gemcitabine	MSeA	μM	μM	MiaPaca2	0.1	0	0.5284
Gemcitabine	MSeA	μM	μM	MiaPaca2	1	0	0.6258
Gemcitabine	MSeA	μM	μM	MiaPaca2	0	2.5	0.4889
Gemcitabine	MSeA	μM	μM	MiaPaca2	0	5	0.1759
Gemcitabine	MSeA	μM	μM	MiaPaca2	0	10	0.1961
Gemcitabine	MSeA	μM	μM	MiaPaca2	0.001	2.5	0.4429	0.0338667
Gemcitabine	MSeA	μM	μM	MiaPaca2	0.001	5	0.255	-0.0796333
Gemcitabine	MSeA	μM	μM	MiaPaca2	0.001	10	0.1775	0.00116667
Gemcitabine	MSeA	μM	μM	MiaPaca2	0.01	2.5	0.4511	0.0256667
Gemcitabine	MSeA	μM	μM	MiaPaca2	0.01	5	0.1819	-0.00653333
Gemcitabine	MSeA	μM	μM	MiaPaca2	0.01	10	0.1899	-0.0112333
Gemcitabine	MSeA	μM	μM	MiaPaca2	0.1	2.5	0.4362	0.0405667
Gemcitabine	MSeA	μM	μM	MiaPaca2	0.1	5	0.2164	-0.0410333
Gemcitabine	MSeA	μM	μM	MiaPaca2	0.1	10	0.1596	0.0190667
Gemcitabine	MSeA	μM	μM	MiaPaca2	1	2.5	0.3939	0.0828667
Gemcitabine	MSeA	μM	μM	MiaPaca2	1	5	0.1396	0.0357667
Gemcitabine	MSeA	μM	μM	MiaPaca2	1	10	0.1571	0.0215667
Gemcitabine	MSeA	μM	μM	MiaPaca2	0	0	0.6571
Gemcitabine	MSeA	μM	μM	MiaPaca2	0.001	0	0.6153
Gemcitabine	MSeA	μM	μM	MiaPaca2	0.01	0	0.6728
Gemcitabine	MSeA	μM	μM	MiaPaca2	0.1	0	0.6255
Gemcitabine	MSeA	μM	μM	MiaPaca2	1	0	0.5599
Gemcitabine	MSeA	μM	μM	MiaPaca2	0	2.5	0.4405
Gemcitabine	MSeA	μM	μM	MiaPaca2	0	5	0.1941
Gemcitabine	MSeA	μM	μM	MiaPaca2	0	10	0.156
Gemcitabine	MSeA	μM	μM	MiaPaca2	0.001	2.5	0.3723	0.104467
Gemcitabine	MSeA	μM	μM	MiaPaca2	0.001	5	0.1789	-0.00353333
Gemcitabine	MSeA	μM	μM	MiaPaca2	0.001	10	0.1916	-0.0129333
Gemcitabine	MSeA	μM	μM	MiaPaca2	0.01	2.5	0.2912	0.185567
Gemcitabine	MSeA	μM	μM	MiaPaca2	0.01	5	0.1901	-0.0147333
Gemcitabine	MSeA	μM	μM	MiaPaca2	0.01	10	0.1875	-0.00883333
Gemcitabine	MSeA	μM	μM	MiaPaca2	0.1	2.5	0.3733	0.103467
Gemcitabine	MSeA	μM	μM	MiaPaca2	0.1	5	0.1823	-0.00693333
Gemcitabine	MSeA	μM	μM	MiaPaca2	0.1	10	0.1497	0.0289667
Gemcitabine	MSeA	μM	μM	MiaPaca2	1	2.5	0.3674	0.109367
Gemcitabine	MSeA	μM	μM	MiaPaca2	1	5	0.1482	0.0271667
Gemcitabine	MSeA	μM	μM	MiaPaca2	1	10	0.144	0.0346667
Gemcitabine	MSeA	μM	μM	Panc1	0	0	0.8244	0
Gemcitabine	MSeA	μM	μM	Panc1	0.01	0	0.8146	0
Gemcitabine	MSeA	μM	μM	Panc1	0.1	0	0.7662	0
Gemcitabine	MSeA	μM	μM	Panc1	1	0	0.7517	0
Gemcitabine	MSeA	μM	μM	Panc1	0	2.5	0.5764	0
Gemcitabine	MSeA	μM	μM	Panc1	0	5	0.4193	0
Gemcitabine	MSeA	μM	μM	Panc1	0	10	0.4431	0
Gemcitabine	MSeA	μM	μM	Panc1	0.001	2.5	0.4981	0.0858
Gemcitabine	MSeA	μM	μM	Panc1	0.001	5	0.4269	-0.0348
Gemcitabine	MSeA	μM	μM	Panc1	0.001	10	0.39	0.0712667
Gemcitabine	MSeA	μM	μM	Panc1	0.01	2.5	0.5967	-0.0128
Gemcitabine	MSeA	μM	μM	Panc1	0.01	5	0.4363	-0.0442
Gemcitabine	MSeA	μM	μM	Panc1	0.01	10	0.4984	-0.0371333
Gemcitabine	MSeA	μM	μM	Panc1	0.1	2.5	0.4237	0.1602
Gemcitabine	MSeA	μM	μM	Panc1	0.1	5	0.3928	-0.0007
Gemcitabine	MSeA	μM	μM	Panc1	0.1	10	0.3654	0.0958667
Gemcitabine	MSeA	μM	μM	Panc1	1	2.5	0.5249	0.059
Gemcitabine	MSeA	μM	μM	Panc1	1	5	0.3483	0.0438
Gemcitabine	MSeA	μM	μM	Panc1	1	10	0.3982	0.0630667
Gemcitabine	MSeA	μM	μM	Panc1	0	0	0.8077	0
Gemcitabine	MSeA	μM	μM	Panc1	0.01	0	0.9075	0
Gemcitabine	MSeA	μM	μM	Panc1	0.1	0	0.6377	0
Gemcitabine	MSeA	μM	μM	Panc1	1	0	0.7774	0
Gemcitabine	MSeA	μM	μM	Panc1	0	2.5	0.6779	0
Gemcitabine	MSeA	μM	μM	Panc1	0	5	0.3925	0
Gemcitabine	MSeA	μM	μM	Panc1	0	10	0.4667	0
Gemcitabine	MSeA	μM	μM	Panc1	0.001	2.5	0.5639	0.02
Gemcitabine	MSeA	μM	μM	Panc1	0.001	5	0.4023	-0.0102
Gemcitabine	MSeA	μM	μM	Panc1	0.001	10	0.4251	0.0361667
Gemcitabine	MSeA	μM	μM	Panc1	0.01	2.5	0.72	-0.1361
Gemcitabine	MSeA	μM	μM	Panc1	0.01	5	0.4295	-0.0374
Gemcitabine	MSeA	μM	μM	Panc1	0.01	10	0.4737	-0.0124333
Gemcitabine	MSeA	μM	μM	Panc1	0.1	2.5	0.4944	0.0895
Gemcitabine	MSeA	μM	μM	Panc1	0.1	5	0.411	-0.0189
Gemcitabine	MSeA	μM	μM	Panc1	0.1	10	0.4613	-3.33333e-05
Gemcitabine	MSeA	μM	μM	Panc1	1	2.5	0.6151	-0.0312
Gemcitabine	MSeA	μM	μM	Panc1	1	5	0.3927	-0.0006
Gemcitabine	MSeA	μM	μM	Panc1	1	10	0.4374	0.0238667
Gemcitabine	MSeA	μM	μM	Panc1	0	0	0.8113	0
Gemcitabine	MSeA	μM	μM	Panc1	0.001	0	0.6809	0
Gemcitabine	MSeA	μM	μM	Panc1	0.01	0	0.7841	0
Gemcitabine	MSeA	μM	μM	Panc1	0.1	0	0.7471	0
Gemcitabine	MSeA	μM	μM	Panc1	1	0	0.7855	0
Gemcitabine	MSeA	μM	μM	Panc1	0	2.5	0.4974	0
Gemcitabine	MSeA	μM	μM	Panc1	0	5	0.3645	0
Gemcitabine	MSeA	μM	μM	Panc1	0	10	0.474	0
Gemcitabine	MSeA	μM	μM	Panc1	0.001	2.5	0.4407	0.1432
Gemcitabine	MSeA	μM	μM	Panc1	0.001	5	0.4649	-0.0728
Gemcitabine	MSeA	μM	μM	Panc1	0.001	10	0.4055	0.0557667
Gemcitabine	MSeA	μM	μM	Panc1	0.01	2.5	0.5825	0.0014
Gemcitabine	MSeA	μM	μM	Panc1	0.01	5	0.4375	-0.0454
Gemcitabine	MSeA	μM	μM	Panc1	0.01	10	0.4404	0.0208667
Gemcitabine	MSeA	μM	μM	Panc1	0.1	2.5	0.4329	0.151
Gemcitabine	MSeA	μM	μM	Panc1	0.1	5	0.3881	0.004
Gemcitabine	MSeA	μM	μM	Panc1	0.1	10	0.3442	0.117067
Gemcitabine	MSeA	μM	μM	Panc1	1	2.5	0.5595	0.0244
Gemcitabine	MSeA	μM	μM	Panc1	1	5	0.3723	0.0198
Gemcitabine	MSeA	μM	μM	Panc1	1	10	0.4167	0.0445667

## Sheet: Table S3 - Timeseries MuSyC
Parameter	24 hours	48 hours	72 hours	Description
E0_lower	1.46778	1.85468	2.0658	The effect metric when no drug is present (d1=d2=0)
E0	1.51445	1.89465	2.12647
E0_upper	1.56268	1.93873	2.18491
E1_lower	0.66749	2.9829e-27	1.83329e-32	The maximum effect achievable by drug 1 alone
E1	0.73942	0.000835777	0.00865627
E1_upper	0.796231	0.160774	0.158827
E2_lower	0.229017	0.304337	0.0691679	The maximum effect achievable by drug 2 alone
E2	0.468109	0.365739	0.153213
E2_upper	0.617241	0.417258	0.23059
E3_lower	0.124368	0.000363733	2.67079e-19	The maximum effect achievable by the combination of both drugs 1 and 2
E3	0.382372	0.130519	0.0401378
E3_upper	0.459405	0.231417	0.133117
h1_lower	0.575681	0.323756	0.425186	The Hill slope of drug 1
h1	0.793694	0.358057	0.486293
h1_upper	1.08036	0.447555	0.626121
h2_lower	1.38847	3.34978	4.06046	The Hill slope of drug 2
h2	1.77174	3.90628	4.74976
h2_upper	2.46142	4.61078	5.75758
C1_lower	0.00963305	0.00646473	0.00416901	The EC50 of drug 1 (this is the concentration of drug 1 that achieves an effect halfway between E0 and E1)
C1	0.0135248	0.0105263	0.00613766
C1_upper	0.0197744	0.0137565	0.00858949
C2_lower	3.55438	2.98412	3.49623	The EC50 of drug 2 (this is the concentration of drug 2 that achieves an effect halfway between E0 and E2)
C2	4.41006	3.12681	3.69514
C2_upper	6.03941	3.28438	3.93243
beta_lower	-0.145829	-0.11796	-0.0613424	Synergistic Efficacy – How many times stronger (or weaker) the combination is, compared to the strongest single drug. Synergistic (>0). Antagonistic (<0)
beta	0.0819402	-0.0684774	-0.0148651
beta_upper	0.385806	0.0149943	0.059191
alpha12_lower	0.289761	1.82142	0.000914782	Synergistic Potency – How drug 1 affects drug 2’s dose. In the presence of drug 1, drug 2’s dose is effectively multiplied by alpha12. Synergistic (>1). Antagonistic (<1).
alpha12	1.55662	2.48151	2.17453
alpha12_upper	2.80507	2.77711	7.04919
alpha21_lower	1.55623	0.000102536	0.000100806	Synergistic Potency – How drug 2 affects drug 1’s dose. In the presence of drug 2, drug 1’s dose is effectively multiplied by alpha21. Synergistic (>1). Antagonistic (<1).
alpha21	26.5929	0.293338	0.540123
alpha21_upper	10000	5.69128	10000
gamma12_lower	0.286072	0.495397	0.00885003	Synergistic Cooperativity – How drug 1 affects drug 2’s Hill slope. In the presence of drug 1, drug 2’s Hill slope is effectively multiplied by gamma12. Synergistic (>1). Antagonistic (<1).
gamma12	0.611855	3.00369	0.275332
gamma12_upper	1.20732	12.6856	1.03191
gamma21_lower	0.110695	0.111613	0.0157073	Synergistic Cooperativity – How drug 2 affects drug 1’s Hill slope. In the presence of drug 2, drug 1’s Hill slope is effectively multiplied by gamma21. Synergistic (>1). Antagonistic (<1).
gamma21	1.64263	0.604961	0.350013
gamma21_upper	77.8634	1.59985	14.6764
Converged	True	True	True	Whether or not the MuSyC model converged to a best fit
R^2	0.984377	0.993482	0.990551	R^2 value
RSS	0.0898846	0.102311	0.25339	Residual sum of squared errors
BIC	-336.988	-329.218	-274.804	Bayesian information criterion
AIC	-357.576	-349.806	-295.392	Akaike information criterion
Bootstrap Iterations	490	493	500	The number of successful bootstrap iterations to find confidence intervals
drug1.name	Gemcitabine	Gemcitabine	Gemcitabine
drug2.name	MSeA	MSeA	MSeA
drug1.units	μM	μM	μM
drug2.units	μM	μM	μM
sample	BxPC-3	BxPC-3	BxPC-3

## Sheet: Table S4 - Timeseries HSA
drug1.name	drug2.name	drug1.units	drug2.units	sample	time (hrs)	drug1.conc	drug2.conc	effect	hsa
Gemcitabine	MSeA	μM	μM	BxPC-3	24	0	0	1.5668
Gemcitabine	MSeA	μM	μM	BxPC-3	24	0.01	0	1.2128
Gemcitabine	MSeA	μM	μM	BxPC-3	24	0.1	0	0.8688
Gemcitabine	MSeA	μM	μM	BxPC-3	24	1	0	0.765
Gemcitabine	MSeA	μM	μM	BxPC-3	24	0	1.25	1.4018
Gemcitabine	MSeA	μM	μM	BxPC-3	24	0	2.5	1.3085
Gemcitabine	MSeA	μM	μM	BxPC-3	24	0	5	0.9697
Gemcitabine	MSeA	μM	μM	BxPC-3	24	0	10	0.6883
Gemcitabine	MSeA	μM	μM	BxPC-3	24	0.01	1.25	0.9704	0.2254
Gemcitabine	MSeA	μM	μM	BxPC-3	24	0.01	2.5	0.858	0.3378
Gemcitabine	MSeA	μM	μM	BxPC-3	24	0.01	5	0.6341	0.272167
Gemcitabine	MSeA	μM	μM	BxPC-3	24	0.01	10	0.5519	0.1221
Gemcitabine	MSeA	μM	μM	BxPC-3	24	0.1	1.25	0.6997	0.164667
Gemcitabine	MSeA	μM	μM	BxPC-3	24	0.1	2.5	0.6993	0.165067
Gemcitabine	MSeA	μM	μM	BxPC-3	24	0.1	5	0.5526	0.311767
Gemcitabine	MSeA	μM	μM	BxPC-3	24	0.1	10	0.4699	0.2041
Gemcitabine	MSeA	μM	μM	BxPC-3	24	1	1.25	0.596	0.159233
Gemcitabine	MSeA	μM	μM	BxPC-3	24	1	2.5	0.6416	0.113633
Gemcitabine	MSeA	μM	μM	BxPC-3	24	1	5	0.5041	0.251133
Gemcitabine	MSeA	μM	μM	BxPC-3	24	1	10	0.4732	0.2008
Gemcitabine	MSeA	μM	μM	BxPC-3	24	0	0	1.5052
Gemcitabine	MSeA	μM	μM	BxPC-3	24	0.01	0	1.1783
Gemcitabine	MSeA	μM	μM	BxPC-3	24	0.1	0	0.8404
Gemcitabine	MSeA	μM	μM	BxPC-3	24	1	0	0.7232
Gemcitabine	MSeA	μM	μM	BxPC-3	24	0	1.25	1.3633
Gemcitabine	MSeA	μM	μM	BxPC-3	24	0	2.5	1.3151
Gemcitabine	MSeA	μM	μM	BxPC-3	24	0	5	0.9015
Gemcitabine	MSeA	μM	μM	BxPC-3	24	0	10	0.6994
Gemcitabine	MSeA	μM	μM	BxPC-3	24	0.01	1.25	1.0322	0.1636
Gemcitabine	MSeA	μM	μM	BxPC-3	24	0.01	2.5	0.7985	0.3973
Gemcitabine	MSeA	μM	μM	BxPC-3	24	0.01	5	0.5996	0.306667
Gemcitabine	MSeA	μM	μM	BxPC-3	24	0.01	10	0.5114	0.1626
Gemcitabine	MSeA	μM	μM	BxPC-3	24	0.1	1.25	0.7744	0.0899667
Gemcitabine	MSeA	μM	μM	BxPC-3	24	0.1	2.5	0.6778	0.186567
Gemcitabine	MSeA	μM	μM	BxPC-3	24	0.1	5	0.4998	0.364567
Gemcitabine	MSeA	μM	μM	BxPC-3	24	0.1	10	0.4679	0.2061
Gemcitabine	MSeA	μM	μM	BxPC-3	24	1	1.25	0.6729	0.0823333
Gemcitabine	MSeA	μM	μM	BxPC-3	24	1	2.5	0.5918	0.163433
Gemcitabine	MSeA	μM	μM	BxPC-3	24	1	5	0.4965	0.258733
Gemcitabine	MSeA	μM	μM	BxPC-3	24	1	10	0.4953	0.1787
Gemcitabine	MSeA	μM	μM	BxPC-3	24	0	0	1.5015
Gemcitabine	MSeA	μM	μM	BxPC-3	24	0.01	0	1.1963
Gemcitabine	MSeA	μM	μM	BxPC-3	24	0.1	0	0.8839
Gemcitabine	MSeA	μM	μM	BxPC-3	24	1	0	0.7775
Gemcitabine	MSeA	μM	μM	BxPC-3	24	0	1.25	1.3528
Gemcitabine	MSeA	μM	μM	BxPC-3	24	0	2.5	1.2256
Gemcitabine	MSeA	μM	μM	BxPC-3	24	0	5	0.8476
Gemcitabine	MSeA	μM	μM	BxPC-3	24	0	10	0.6343
Gemcitabine	MSeA	μM	μM	BxPC-3	24	0.01	1.25	0.8907	0.3051
Gemcitabine	MSeA	μM	μM	BxPC-3	24	0.01	2.5	0.8414	0.3544
Gemcitabine	MSeA	μM	μM	BxPC-3	24	0.01	5	0.5813	0.324967
Gemcitabine	MSeA	μM	μM	BxPC-3	24	0.01	10	0.475	0.199
Gemcitabine	MSeA	μM	μM	BxPC-3	24	0.1	1.25	0.7586	0.105767
Gemcitabine	MSeA	μM	μM	BxPC-3	24	0.1	2.5	0.6692	0.195167
Gemcitabine	MSeA	μM	μM	BxPC-3	24	0.1	5	0.5391	0.325267
Gemcitabine	MSeA	μM	μM	BxPC-3	24	0.1	10	0.43	0.244
Gemcitabine	MSeA	μM	μM	BxPC-3	24	1	1.25	0.694	0.0612333
Gemcitabine	MSeA	μM	μM	BxPC-3	24	1	2.5	0.5675	0.187733
Gemcitabine	MSeA	μM	μM	BxPC-3	24	1	5	0.5406	0.214633
Gemcitabine	MSeA	μM	μM	BxPC-3	24	1	10	0.382	0.292
Gemcitabine	MSeA	μM	μM	BxPC-3	48	0	0	1.8365
Gemcitabine	MSeA	μM	μM	BxPC-3	48	0.01	0	1.0397
Gemcitabine	MSeA	μM	μM	BxPC-3	48	0.1	0	0.5831
Gemcitabine	MSeA	μM	μM	BxPC-3	48	1	0	0.3096
Gemcitabine	MSeA	μM	μM	BxPC-3	48	0	1.25	1.9095
Gemcitabine	MSeA	μM	μM	BxPC-3	48	0	2.5	1.5744
Gemcitabine	MSeA	μM	μM	BxPC-3	48	0	5	0.6007
Gemcitabine	MSeA	μM	μM	BxPC-3	48	0	10	0.4175
Gemcitabine	MSeA	μM	μM	BxPC-3	48	0.01	1.25	0.8135	0.1607
Gemcitabine	MSeA	μM	μM	BxPC-3	48	0.01	2.5	0.6176	0.3566
Gemcitabine	MSeA	μM	μM	BxPC-3	48	0.01	5	0.3711	0.2038
Gemcitabine	MSeA	μM	μM	BxPC-3	48	0.01	10	0.2947	0.0799333
Gemcitabine	MSeA	μM	μM	BxPC-3	48	0.1	1.25	0.5442	0.0264667
Gemcitabine	MSeA	μM	μM	BxPC-3	48	0.1	2.5	0.4064	0.164267
Gemcitabine	MSeA	μM	μM	BxPC-3	48	0.1	5	0.3346	0.236067
Gemcitabine	MSeA	μM	μM	BxPC-3	48	0.1	10	0.2694	0.105233
Gemcitabine	MSeA	μM	μM	BxPC-3	48	1	1.25	0.2923	0.0127
Gemcitabine	MSeA	μM	μM	BxPC-3	48	1	2.5	0.2594	0.0456
Gemcitabine	MSeA	μM	μM	BxPC-3	48	1	5	0.2071	0.0979
Gemcitabine	MSeA	μM	μM	BxPC-3	48	1	10	0.2074	0.0976
Gemcitabine	MSeA	μM	μM	BxPC-3	48	0	0	1.8835
Gemcitabine	MSeA	μM	μM	BxPC-3	48	0.01	0	0.9947
Gemcitabine	MSeA	μM	μM	BxPC-3	48	0.1	0	0.5879
Gemcitabine	MSeA	μM	μM	BxPC-3	48	1	0	0.3078
Gemcitabine	MSeA	μM	μM	BxPC-3	48	0	1.25	1.9394
Gemcitabine	MSeA	μM	μM	BxPC-3	48	0	2.5	1.4017
Gemcitabine	MSeA	μM	μM	BxPC-3	48	0	5	0.6385
Gemcitabine	MSeA	μM	μM	BxPC-3	48	0	10	0.3527
Gemcitabine	MSeA	μM	μM	BxPC-3	48	0.01	1.25	0.8682	0.106
Gemcitabine	MSeA	μM	μM	BxPC-3	48	0.01	2.5	0.5666	0.4076
Gemcitabine	MSeA	μM	μM	BxPC-3	48	0.01	5	0.3908	0.1841
Gemcitabine	MSeA	μM	μM	BxPC-3	48	0.01	10	0.2824	0.0922333
Gemcitabine	MSeA	μM	μM	BxPC-3	48	0.1	1.25	0.5089	0.0617667
Gemcitabine	MSeA	μM	μM	BxPC-3	48	0.1	2.5	0.4248	0.145867
Gemcitabine	MSeA	μM	μM	BxPC-3	48	0.1	5	0.2842	0.286467
Gemcitabine	MSeA	μM	μM	BxPC-3	48	0.1	10	0.239	0.135633
Gemcitabine	MSeA	μM	μM	BxPC-3	48	1	1.25	0.2702	0.0348
Gemcitabine	MSeA	μM	μM	BxPC-3	48	1	2.5	0.2694	0.0356
Gemcitabine	MSeA	μM	μM	BxPC-3	48	1	5	0.1879	0.1171
Gemcitabine	MSeA	μM	μM	BxPC-3	48	1	10	0.2083	0.0967
Gemcitabine	MSeA	μM	μM	BxPC-3	48	0	0	1.8645
Gemcitabine	MSeA	μM	μM	BxPC-3	48	0.01	0	0.8882
Gemcitabine	MSeA	μM	μM	BxPC-3	48	0.1	0	0.541
Gemcitabine	MSeA	μM	μM	BxPC-3	48	1	0	0.2976
Gemcitabine	MSeA	μM	μM	BxPC-3	48	0	1.25	1.8104
Gemcitabine	MSeA	μM	μM	BxPC-3	48	0	2.5	1.3658
Gemcitabine	MSeA	μM	μM	BxPC-3	48	0	5	0.4855
Gemcitabine	MSeA	μM	μM	BxPC-3	48	0	10	0.3537
Gemcitabine	MSeA	μM	μM	BxPC-3	48	0.01	1.25	0.7711	0.2031
Gemcitabine	MSeA	μM	μM	BxPC-3	48	0.01	2.5	0.5328	0.4414
Gemcitabine	MSeA	μM	μM	BxPC-3	48	0.01	5	0.3494	0.2255
Gemcitabine	MSeA	μM	μM	BxPC-3	48	0.01	10	0.2652	0.109433
Gemcitabine	MSeA	μM	μM	BxPC-3	48	0.1	1.25	0.5635	0.00716667
Gemcitabine	MSeA	μM	μM	BxPC-3	48	0.1	2.5	0.4155	0.155167
Gemcitabine	MSeA	μM	μM	BxPC-3	48	0.1	5	0.2826	0.288067
Gemcitabine	MSeA	μM	μM	BxPC-3	48	0.1	10	0.2597	0.114933
Gemcitabine	MSeA	μM	μM	BxPC-3	48	1	1.25	0.2561	0.0489
Gemcitabine	MSeA	μM	μM	BxPC-3	48	1	2.5	0.2377	0.0673
Gemcitabine	MSeA	μM	μM	BxPC-3	48	1	5	0.2303	0.0747
Gemcitabine	MSeA	μM	μM	BxPC-3	48	1	10	0.2354	0.0696
Gemcitabine	MSeA	μM	μM	BxPC-3	72	0	0	2.2624
Gemcitabine	MSeA	μM	μM	BxPC-3	72	0.01	0	1.0535
Gemcitabine	MSeA	μM	μM	BxPC-3	72	0.1	0	0.4383
Gemcitabine	MSeA	μM	μM	BxPC-3	72	1	0	0.1623
Gemcitabine	MSeA	μM	μM	BxPC-3	72	0	1.25	2.2052
Gemcitabine	MSeA	μM	μM	BxPC-3	72	0	2.5	2.0346
Gemcitabine	MSeA	μM	μM	BxPC-3	72	0	5	0.5754
Gemcitabine	MSeA	μM	μM	BxPC-3	72	0	10	0.1649
Gemcitabine	MSeA	μM	μM	BxPC-3	72	0.01	1.25	0.751	0.2812
Gemcitabine	MSeA	μM	μM	BxPC-3	72	0.01	2.5	0.5688	0.4634
Gemcitabine	MSeA	μM	μM	BxPC-3	72	0.01	5	0.2941	0.225267
Gemcitabine	MSeA	μM	μM	BxPC-3	72	0.01	10	0.1521	0.0105667
Gemcitabine	MSeA	μM	μM	BxPC-3	72	0.1	1.25	0.4011	0.0386667
Gemcitabine	MSeA	μM	μM	BxPC-3	72	0.1	2.5	0.3438	0.0959667
Gemcitabine	MSeA	μM	μM	BxPC-3	72	0.1	5	0.1734	0.266367
Gemcitabine	MSeA	μM	μM	BxPC-3	72	0.1	10	0.0835	0.0791667
Gemcitabine	MSeA	μM	μM	BxPC-3	72	1	1.25	0.2016	-0.0533333
Gemcitabine	MSeA	μM	μM	BxPC-3	72	1	2.5	0.1565	-0.00823333
Gemcitabine	MSeA	μM	μM	BxPC-3	72	1	5	0.0667	0.0815667
Gemcitabine	MSeA	μM	μM	BxPC-3	72	1	10	0.0555	0.0927667
Gemcitabine	MSeA	μM	μM	BxPC-3	72	0	0	2.0039
Gemcitabine	MSeA	μM	μM	BxPC-3	72	0.01	0	1.0214
Gemcitabine	MSeA	μM	μM	BxPC-3	72	0.1	0	0.4412
Gemcitabine	MSeA	μM	μM	BxPC-3	72	1	0	0.1261
Gemcitabine	MSeA	μM	μM	BxPC-3	72	0	1.25	2.022
Gemcitabine	MSeA	μM	μM	BxPC-3	72	0	2.5	1.9423
Gemcitabine	MSeA	μM	μM	BxPC-3	72	0	5	0.555
Gemcitabine	MSeA	μM	μM	BxPC-3	72	0	10	0.173
Gemcitabine	MSeA	μM	μM	BxPC-3	72	0.01	1.25	0.8173	0.2149
Gemcitabine	MSeA	μM	μM	BxPC-3	72	0.01	2.5	0.5368	0.4954
Gemcitabine	MSeA	μM	μM	BxPC-3	72	0.01	5	0.2757	0.243667
Gemcitabine	MSeA	μM	μM	BxPC-3	72	0.01	10	0.1322	0.0304667
Gemcitabine	MSeA	μM	μM	BxPC-3	72	0.1	1.25	0.3514	0.0883667
Gemcitabine	MSeA	μM	μM	BxPC-3	72	0.1	2.5	0.316	0.123767
Gemcitabine	MSeA	μM	μM	BxPC-3	72	0.1	5	0.1819	0.257867
Gemcitabine	MSeA	μM	μM	BxPC-3	72	0.1	10	0.0891	0.0735667
Gemcitabine	MSeA	μM	μM	BxPC-3	72	1	1.25	0.1603	-0.0120333
Gemcitabine	MSeA	μM	μM	BxPC-3	72	1	2.5	0.1321	0.0161667
Gemcitabine	MSeA	μM	μM	BxPC-3	72	1	5	0.0711	0.0771667
Gemcitabine	MSeA	μM	μM	BxPC-3	72	1	10	0.0706	0.0776667
Gemcitabine	MSeA	μM	μM	BxPC-3	72	0	0	2.1904
Gemcitabine	MSeA	μM	μM	BxPC-3	72	0.01	0	1.0217
Gemcitabine	MSeA	μM	μM	BxPC-3	72	0.1	0	0.4398
Gemcitabine	MSeA	μM	μM	BxPC-3	72	1	0	0.1564
Gemcitabine	MSeA	μM	μM	BxPC-3	72	0	1.25	2.083
Gemcitabine	MSeA	μM	μM	BxPC-3	72	0	2.5	1.7297
Gemcitabine	MSeA	μM	μM	BxPC-3	72	0	5	0.4277
Gemcitabine	MSeA	μM	μM	BxPC-3	72	0	10	0.1501
Gemcitabine	MSeA	μM	μM	BxPC-3	72	0.01	1.25	0.7761	0.2561
Gemcitabine	MSeA	μM	μM	BxPC-3	72	0.01	2.5	0.4345	0.5977
Gemcitabine	MSeA	μM	μM	BxPC-3	72	0.01	5	0.256	0.263367
Gemcitabine	MSeA	μM	μM	BxPC-3	72	0.01	10	0.1165	0.0461667
Gemcitabine	MSeA	μM	μM	BxPC-3	72	0.1	1.25	0.3773	0.0624667
Gemcitabine	MSeA	μM	μM	BxPC-3	72	0.1	2.5	0.3227	0.117067
Gemcitabine	MSeA	μM	μM	BxPC-3	72	0.1	5	0.146	0.293767
Gemcitabine	MSeA	μM	μM	BxPC-3	72	0.1	10	0.0819	0.0807667
Gemcitabine	MSeA	μM	μM	BxPC-3	72	1	1.25	0.137	0.0112667
Gemcitabine	MSeA	μM	μM	BxPC-3	72	1	2.5	0.1144	0.0338667
Gemcitabine	MSeA	μM	μM	BxPC-3	72	1	5	0.0563	0.0919667
Gemcitabine	MSeA	μM	μM	BxPC-3	72	1	10	0.0512	0.0970667

## Sheet: Table S5 - 3D Culture MuSyC
Parameter	BxPC3 3D Culture	Description
E0_lower	0.760192	The effect metric when no drug is present (d1=d2=0)
E0	0.810401
E0_upper	0.85949
E1_lower	3.40009e-07	The maximum effect achievable by drug 1 alone
E1	0.0643747
E1_upper	0.34956
E2_lower	0.210941	The maximum effect achievable by drug 2 alone
E2	0.267939
E2_upper	0.297514
E3_lower	0.0213283	The maximum effect achievable by the combination of both drugs 1 and 2
E3	0.603898
E3_upper	0.999991
h1_lower	0.0819766	The Hill slope of drug 1
h1	0.135019
h1_upper	0.226828
h2_lower	1.35891	The Hill slope of drug 2
h2	2.03593
h2_upper	3.10684
C1_lower	0.255224	The EC50 of drug 1 (this is the concentration of drug 1 that achieves an effect halfway between E0 and E1)
C1	99.9979
C1_upper	100
C2_lower	2.10073	The EC50 of drug 2 (this is the concentration of drug 2 that achieves an effect halfway between E0 and E2)
C2	2.47163
C2_upper	3.12892
beta_lower	-1.27843	Synergistic Efficacy – How many times stronger (or weaker) the combination is, compared to the strongest single drug. Synergistic (>0). Antagonistic (<0)
beta	-0.723196
beta_upper	0.195036
alpha12_lower	0.000102779	Synergistic Potency – How drug 1 affects drug 2’s dose. In the presence of drug 1, drug 2’s dose is effectively multiplied by alpha12. Synergistic (>1). Antagonistic (<1).
alpha12	0.30896
alpha12_upper	5583.27
alpha21_lower	0.000100672	Synergistic Potency – How drug 2 affects drug 1’s dose. In the presence of drug 2, drug 1’s dose is effectively multiplied by alpha21. Synergistic (>1). Antagonistic (<1).
alpha21	0.104529
alpha21_upper	9.78559
gamma12_lower	0.000103499	Synergistic Cooperativity – How drug 1 affects drug 2’s Hill slope. In the presence of drug 1, drug 2’s Hill slope is effectively multiplied by gamma12. Synergistic (>1). Antagonistic (<1).
gamma12	0.0209172
gamma12_upper	1417.47
gamma21_lower	0.386637	Synergistic Cooperativity – How drug 2 affects drug 1’s Hill slope. In the presence of drug 2, drug 1’s Hill slope is effectively multiplied by gamma21. Synergistic (>1). Antagonistic (<1).
gamma21	23.4813
gamma21_upper	9701.86
Converged	True	Whether or not the MuSyC model converged to a best fit
R^2	0.895854	R^2 value
RSS	0.165582	Residual sum of squared errors
BIC	-402.556	Bayesian information criterion
AIC	-427.651	Akaike information criterion
Bootstrap Iterations	499	The number of successful bootstrap iterations to find confidence intervals
drug1.name	Gemcitabine
drug2.name	MSeA
drug1.units	μM
drug2.units	μM
sample	BxPC3 in 3D Culture

## Sheet: Table S6 - 3D Culture HSA
drug1.name	drug2.name	drug1.units	drug2.units	sample	drug1.conc	drug2.conc	effect	hsa
Gemcitabine	MSeA	μM	μM	BxPC-3 3D	0	0	1.0967
Gemcitabine	MSeA	μM	μM	BxPC-3 3D	0.01	0	0.5887
Gemcitabine	MSeA	μM	μM	BxPC-3 3D	0.1	0	0.6196
Gemcitabine	MSeA	μM	μM	BxPC-3 3D	1	0	0.5336
Gemcitabine	MSeA	μM	μM	BxPC-3 3D	10	0	0.5125
Gemcitabine	MSeA	μM	μM	BxPC-3 3D	0	2.5	0.5017
Gemcitabine	MSeA	μM	μM	BxPC-3 3D	0	5	0.3898
Gemcitabine	MSeA	μM	μM	BxPC-3 3D	0	10	0.291
Gemcitabine	MSeA	μM	μM	BxPC-3 3D	0	20	0.3345
Gemcitabine	MSeA	μM	μM	BxPC-3 3D	0.01	2.5	0.4638	0.0525667
Gemcitabine	MSeA	μM	μM	BxPC-3 3D	0.01	5	0.3683	0.0293333
Gemcitabine	MSeA	μM	μM	BxPC-3 3D	0.01	10	0.2978	-3.33333e-05
Gemcitabine	MSeA	μM	μM	BxPC-3 3D	0.01	20	0.2788	0.0232333
Gemcitabine	MSeA	μM	μM	BxPC-3 3D	0.1	2.5	0.4578	0.0585667
Gemcitabine	MSeA	μM	μM	BxPC-3 3D	0.1	5	0.3571	0.0405333
Gemcitabine	MSeA	μM	μM	BxPC-3 3D	0.1	10	0.2921	0.00566667
Gemcitabine	MSeA	μM	μM	BxPC-3 3D	0.1	20	0.2764	0.0256333
Gemcitabine	MSeA	μM	μM	BxPC-3 3D	1	2.5	0.4338	0.0825667
Gemcitabine	MSeA	μM	μM	BxPC-3 3D	1	5	0.3656	0.0320333
Gemcitabine	MSeA	μM	μM	BxPC-3 3D	1	10	0.2938	0.00396667
Gemcitabine	MSeA	μM	μM	BxPC-3 3D	1	20	0.2851	0.0169333
Gemcitabine	MSeA	μM	μM	BxPC-3 3D	10	2.5	0.3981	0.105033
Gemcitabine	MSeA	μM	μM	BxPC-3 3D	10	5	0.3132	0.0844333
Gemcitabine	MSeA	μM	μM	BxPC-3 3D	10	10	0.2704	0.0273667
Gemcitabine	MSeA	μM	μM	BxPC-3 3D	10	20	0.27	0.0320333
Gemcitabine	MSeA	μM	μM	BxPC-3 3D	0	0	0.7443
Gemcitabine	MSeA	μM	μM	BxPC-3 3D	0.01	0	0.6324
Gemcitabine	MSeA	μM	μM	BxPC-3 3D	0.1	0	0.6135
Gemcitabine	MSeA	μM	μM	BxPC-3 3D	1	0	0.5381
Gemcitabine	MSeA	μM	μM	BxPC-3 3D	10	0	0.5296
Gemcitabine	MSeA	μM	μM	BxPC-3 3D	0	2.5	0.5549
Gemcitabine	MSeA	μM	μM	BxPC-3 3D	0	5	0.3964
Gemcitabine	MSeA	μM	μM	BxPC-3 3D	0	10	0.3119
Gemcitabine	MSeA	μM	μM	BxPC-3 3D	0	20	0.3028
Gemcitabine	MSeA	μM	μM	BxPC-3 3D	0.01	2.5	0.5074	0.00896667
Gemcitabine	MSeA	μM	μM	BxPC-3 3D	0.01	5	0.368	0.0296333
Gemcitabine	MSeA	μM	μM	BxPC-3 3D	0.01	10	0.3174	-0.0196333
Gemcitabine	MSeA	μM	μM	BxPC-3 3D	0.01	20	0.2673	0.0347333
Gemcitabine	MSeA	μM	μM	BxPC-3 3D	0.1	2.5	0.534	-0.0176333
Gemcitabine	MSeA	μM	μM	BxPC-3 3D	0.1	5	0.366	0.0316333
Gemcitabine	MSeA	μM	μM	BxPC-3 3D	0.1	10	0.3032	-0.00543333
Gemcitabine	MSeA	μM	μM	BxPC-3 3D	0.1	20	0.2752	0.0268333
Gemcitabine	MSeA	μM	μM	BxPC-3 3D	1	2.5	0.4873	0.0290667
Gemcitabine	MSeA	μM	μM	BxPC-3 3D	1	5	0.3475	0.0501333
Gemcitabine	MSeA	μM	μM	BxPC-3 3D	1	10	0.2988	-0.00103333
Gemcitabine	MSeA	μM	μM	BxPC-3 3D	1	20	0.2869	0.0151333
Gemcitabine	MSeA	μM	μM	BxPC-3 3D	10	2.5	0.4654	0.0377333
Gemcitabine	MSeA	μM	μM	BxPC-3 3D	10	5	0.3085	0.0891333
Gemcitabine	MSeA	μM	μM	BxPC-3 3D	10	10	0.2665	0.0312667
Gemcitabine	MSeA	μM	μM	BxPC-3 3D	10	20	0.2736	0.0284333
Gemcitabine	MSeA	μM	μM	BxPC-3 3D	0	0	0.6078
Gemcitabine	MSeA	μM	μM	BxPC-3 3D	0.01	0	0.6601
Gemcitabine	MSeA	μM	μM	BxPC-3 3D	0.1	0	0.6136
Gemcitabine	MSeA	μM	μM	BxPC-3 3D	1	0	0.5312
Gemcitabine	MSeA	μM	μM	BxPC-3 3D	10	0	0.4673
Gemcitabine	MSeA	μM	μM	BxPC-3 3D	0	2.5	0.4925
Gemcitabine	MSeA	μM	μM	BxPC-3 3D	0	5	0.4067
Gemcitabine	MSeA	μM	μM	BxPC-3 3D	0	10	0.2904
Gemcitabine	MSeA	μM	μM	BxPC-3 3D	0	20	0.2688
Gemcitabine	MSeA	μM	μM	BxPC-3 3D	0.01	2.5	0.4777	0.0386667
Gemcitabine	MSeA	μM	μM	BxPC-3 3D	0.01	5	0.3735	0.0241333
Gemcitabine	MSeA	μM	μM	BxPC-3 3D	0.01	10	0.2941	0.00366667
Gemcitabine	MSeA	μM	μM	BxPC-3 3D	0.01	20	0.2776	0.0244333
Gemcitabine	MSeA	μM	μM	BxPC-3 3D	0.1	2.5	0.4993	0.0170667
Gemcitabine	MSeA	μM	μM	BxPC-3 3D	0.1	5	0.3396	0.0580333
Gemcitabine	MSeA	μM	μM	BxPC-3 3D	0.1	10	0.2999	-0.00213333
Gemcitabine	MSeA	μM	μM	BxPC-3 3D	0.1	20	0.2611	0.0409333
Gemcitabine	MSeA	μM	μM	BxPC-3 3D	1	2.5	0.4711	0.0452667
Gemcitabine	MSeA	μM	μM	BxPC-3 3D	1	5	0.3627	0.0349333
Gemcitabine	MSeA	μM	μM	BxPC-3 3D	1	10	0.3032	-0.00543333
Gemcitabine	MSeA	μM	μM	BxPC-3 3D	1	20	0.2523	0.0497333
Gemcitabine	MSeA	μM	μM	BxPC-3 3D	10	2.5	0.4906	0.0125333
Gemcitabine	MSeA	μM	μM	BxPC-3 3D	10	5	0.3411	0.0565333
Gemcitabine	MSeA	μM	μM	BxPC-3 3D	10	10	0.2911	0.00666667
Gemcitabine	MSeA	μM	μM	BxPC-3 3D	10	20	0.2345	0.0675333
